# Supplementary material for: GUN4 Affects the Circadian Clock and Seedlings Adaptation to Changing Light Conditions
Source: MDPI journal article supplement (doi:10.3390/ijms23010194), 2021-12-24
Supplement: s1 [file s1]

## Supplementary Data

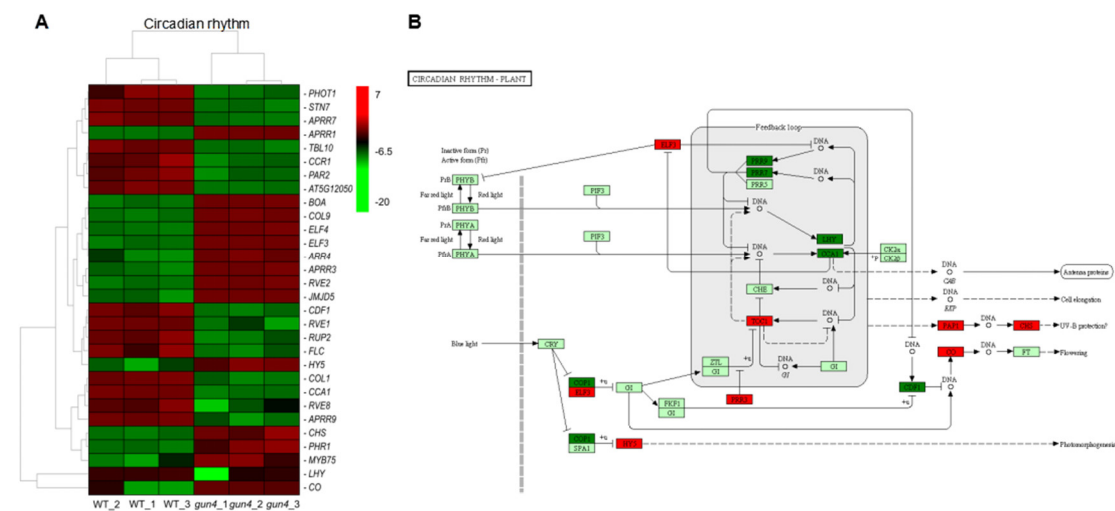

**Supplementary Figure S1. Analysis of expression profiles of differentially expressed genes for circadian and red light signaling in *gun4* mutant.**

(A) Heatmap analysis of circadian gene expression. (B) The expression patterns of clock marker genes in *gun4* in the model of KEGG. Red and green boxes represent up-and down-regulation of annotated genes, respectively.

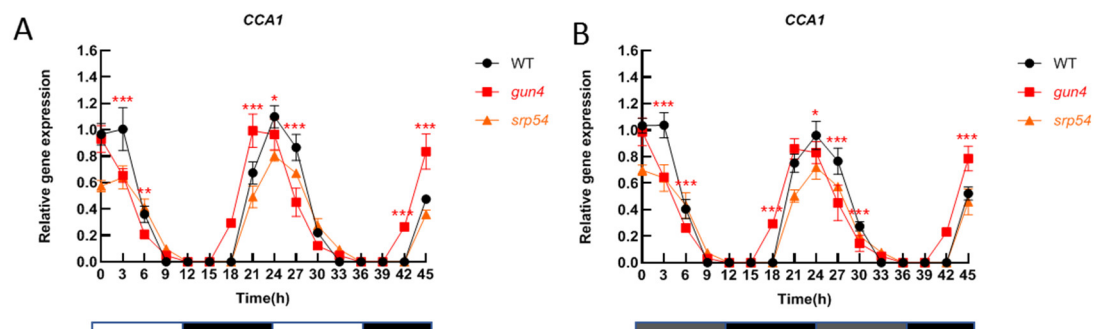

**Supplementary Figure S2. Analysis of the rhythm patterns of *CCA1*.**

Under normal light and continuous darkness conditions, leaf samples of 2-week-old WT, *gun4*, and *srp54* mutant seedlings were taken at different times every 3 hours as indicated. A total of 16 samples were taken. Total RNA was extracted, reverse transcribed into cDNA, and the expression of annotated genes was estimated by qPCR. *Actin* was used as internal control for normalization. Relative expression is given as the mean value ( $\pm$ SD) of three independent experiments. White bars: light; black bars: dark; gray bar: dark in the day. The red stars represent that student's t-test of *gun4* versus WT. \*:  $p < 0.05$ , \*\*:  $p < 0.01$ , \*\*\*:  $p < 0.001$ .



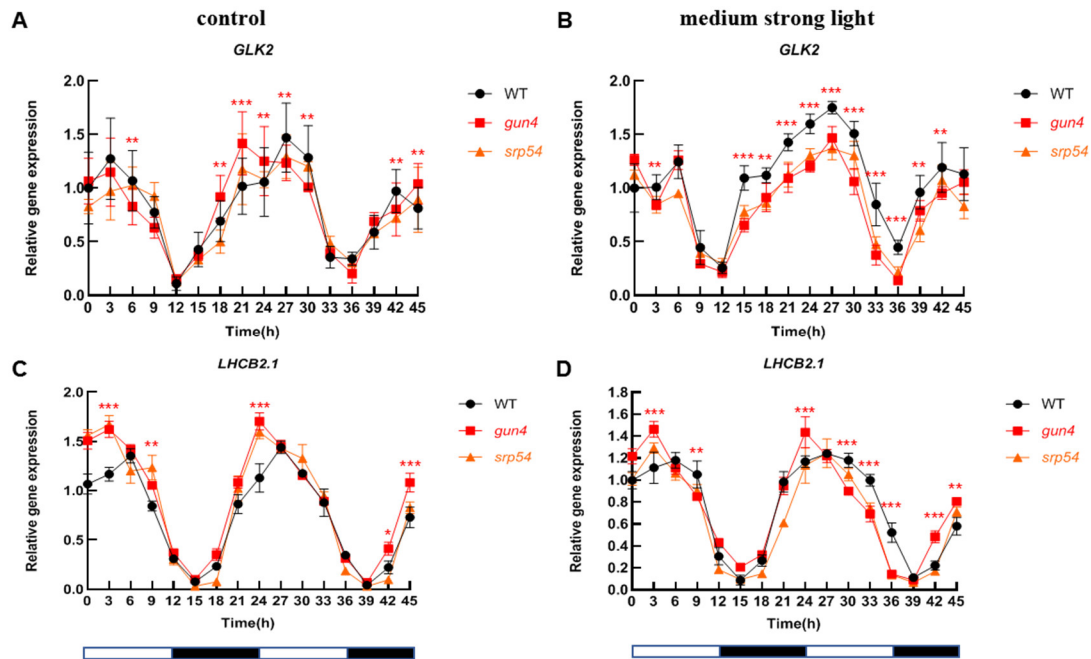

**Supplementary Figure S4. Analysis of the rhythmic patterns of *GLK2* and *LHC2.1*.**

Under normal light and medium-strong light conditions, leaf samples of 2-week-old WT, *gun4*, and *srp54* mutant seedlings were taken at different times every 3 hours as indicated. A total of 16 samples were taken. Total RNA was extracted, reverse transcribed into cDNA, and the expression of annotated genes was estimated by qPCR. *Actin* was used as internal control for normalization. Relative expression is given as the mean value ( $\pm$ SD) of three independent experiments. White bars: light; black bars: dark. The red stars represent that student's t-test of *gun4* versus WT. \*:  $p < 0.05$ , \*\*:  $p < 0.01$ , \*\*\*:  $p < 0.001$ .

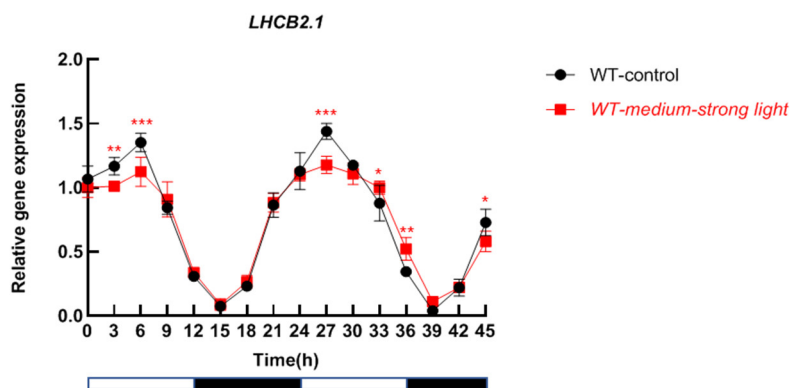

**Supplementary Figure S5. Comparative analysis of the rhythmic patterns of *LHC2.1* under normal light and medium-strong light conditions.**

Under normal light and medium-strong light conditions, leaf samples of 2-week-old WT seedlings were taken at different times every 3 hours as indicated. A total of 16 samples were taken. Total RNA was extracted, reverse

transcribed into cDNA, and the expression of annotated genes was estimated by qPCR. *Actin* was used as internal control for normalization. Relative expression is given as the mean value ( $\pm$ SD) of three independent experiments. White bars: light; black bars: dark. The red stars represent that student's t-test of *gun4* versus WT. \*:  $p < 0.05$ , \*\*:  $p < 0.01$ , \*\*\*:  $p < 0.001$ .

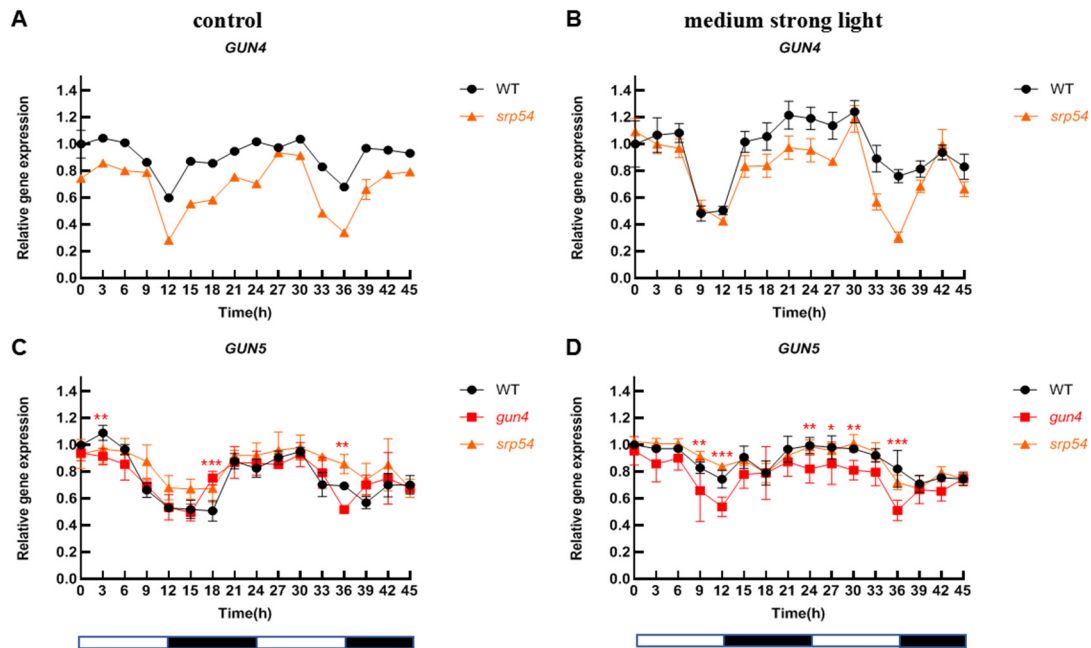

**Supplementary Figure S6. Analysis of the rhythmic patterns of *GUN4* and *GUN5*.**

Under normal light and medium-strong light conditions, leaf samples of 2-week-old WT, *gun4*, and *srp54* mutant seedlings were taken at different times every 3 hours as indicated. A total of 16 samples were taken. Total RNA was extracted, reverse transcribed into cDNA, and the expression of annotated genes was estimated by qPCR. *Actin* was used as internal control for normalization. Relative expression is given as the mean value ( $\pm$ SD) of three independent experiments. White bars: light; black bars: dark. The red stars represent that student's t-test of *gun4* versus WT. \*:  $p < 0.05$ , \*\*:  $p < 0.01$ , \*\*\*:  $p < 0.001$ .

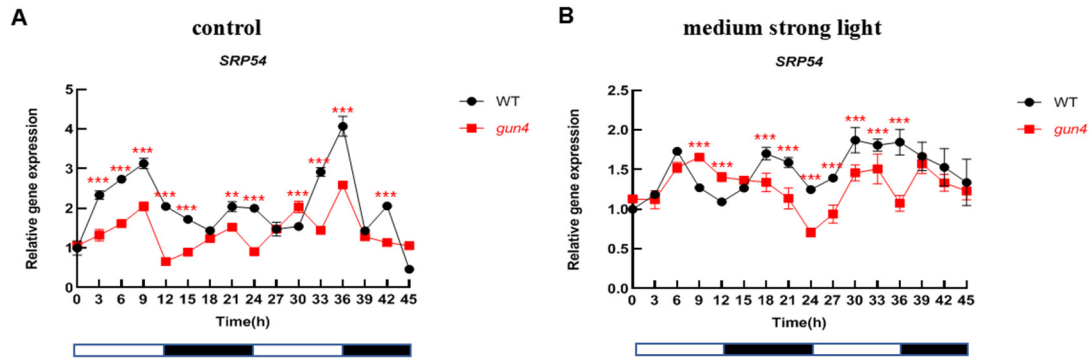

**Supplementary Figure S7. Analysis of the rhythm patterns of *SRP54*.**

Under normal light and medium-strong light conditions, leaf samples of 2-week-old WT, *gun4*, and *srp54* mutant seedlings were taken at different times every 3 hours as indicated. A total of 16 samples were taken. Total RNA was extracted, reverse transcribed into cDNA, and the expression of annotated genes was estimated by qPCR. *Actin* was used as internal control for normalization. Relative expression is given as the mean value ( $\pm$ SD) of three independent experiments. White bars: light; black bars: dark. The red stars represent that student's t-test of *gun4* versus WT. \*:  $p < 0.05$ , \*\*:  $p < 0.01$ , \*\*\*:  $p < 0.001$ .

**Supplementary Table S2. List of mutant lines used in this study.**

| Gene name    | Accession number | Mutant line |
|--------------|------------------|-------------|
| <i>GUN4</i>  | AT3G59400        | SALK_011461 |
| <i>SRP54</i> | AT5G03940        | SALK_079668 |
| <i>CHAOS</i> | AT2G47450        | SALK_047001 |

**Supplementary Table S3. List of oligonucleotides for yeast-two-hybrid analysis.**

| Gene         | Name     | Sequence (5' - 3')                                     |
|--------------|----------|--------------------------------------------------------|
| <i>GUN4</i>  | GUN4BDs  | atggccatggaggccgaattcATGGCGACCACAACTCTCTCC             |
|              | GUN4BDa  | ccgctgcaggtcgacggatccGAAGCTGTAATTTGTTTTAAACA<br>CTCTTT |
| <i>SRP54</i> | SRP54BDs | atggccatggaggccgaattcATGGAGGCTCTTCAATTTTCCA            |
|              | SRP54BDa | ccgctgcaggtcgacggatccGTTACCAGAGCCGAAGCCACG             |
| <i>SRP43</i> | SRP43BDs | atggccatggaggccgaattcATGCAAAGGTCTTCTTGGCC              |
|              | SRP43BDs | ccgctgcaggtcgacggatccTTCATTCATTGGTTGTTGTTGTTG          |
| <i>SRP54</i> | SRP54ADs | gccatggaggccagtgaattcATGGAGGCTCTTCAATTTTCCA            |

|  |          |                                            |
|--|----------|--------------------------------------------|
|  | SRP54ADa | cagctcgagctcgatggatccGTTACCAGAGCCGAAGCCACG |
|  | T7 seq   | TAATACGACTCACTATAGGGCG                     |
|  | AD seq   | AGATGGTGCACGATGCACAG                       |
|  | BD seq   | TTTTCGTTTTTAAACCTAAGAGT                    |

**Supplementary Table S4.** List of oligonucleotides for BiLC analysis.

| Gene         | Name       | Sequence (5' - 3')                                     |
|--------------|------------|--------------------------------------------------------|
| <i>GUN4</i>  | GUN4nLUCs  | acggggggacgagctcggtaccATGGCGACCACAACTCTCTC<br>C        |
|              | GUN4nLUCa  | cgcgtacgagatctggtcgacGAAGCTGTAATTTGTTTTAAAC<br>ACTCTTT |
| <i>SRP43</i> | SRP43cLUCs | tacgcgtcccggggcggtaccATGCAAAAGGTCTTCTTGGCC             |
|              | SRP43cLUCs | acgaaagctctgcaggtcgacTTCATTCATTGGTTGTTGTTGT<br>TG      |
| <i>SRP54</i> | SRP54cLUCs | tacgcgtcccggggcggtaccATGGAGGCTCTTCAATTTTCCA            |
|              | SRP54cLUCa | acgaaagctctgcaggtcgacGTTACCAGAGCCGAAGCCACG             |

**Supplementary Table S5.** List of oligonucleotides for qPCR analysis.

| Gene           | Name       | Sequence (5' - 3')       |
|----------------|------------|--------------------------|
| <i>CCA1</i>    | rtCCA1s    | ACCAGTTGATGATCAAGAGG     |
|                | rtCCA1a    | GGATTGTTGTTGAGGATTCTAC   |
| <i>LHY</i>     | rtLHYs     | GCCAGGATTCTTGTGCT        |
|                | rtLHYa     | CTTTGATTGTTTATGTTCCCAAC  |
| <i>TOC1</i>    | rtTOC1s    | ACTTGACAGAAGAGAGGAAG     |
|                | rtTOC1a    | TTAAATCAACATTCACGCCG     |
| <i>PRR7</i>    | rtPRR7s    | CTTGAAGGTAACAACCTGTGCTC  |
|                | rtPRR7a    | CGTTCTAATCAACCCTTTAGCG   |
| <i>PPR9</i>    | rtPPR9s    | TACCGGTAGAATCAAATCGC     |
|                | rtPPR9a    | TTTCCTCTTCAACCGGAAC      |
| <i>ELF3</i>    | rtELF3s    | TCAACAAAGAGTATTTGCTGTTC  |
|                | rtELF3a    | AGAGGAGGCTTTACCAGA       |
| <i>ELF4</i>    | rtELF4s    | GAATCTTGACCGGAATTTC      |
|                | rtELF4a    | CTAGTATTGAGATCAGAATACATG |
| <i>CO</i>      | rtCOs      | GTCTAGCAAGTGGGTTTGC      |
|                | rtCOa      | TACTTGTGCATGAGCTGTG      |
| <i>GLK1</i>    | rtGLK1s    | GATTTAGAGCACCGCCA        |
|                | rtGLK1a    | CAGCCGGCGGATTTAAT        |
| <i>GLK2</i>    | rtGLK2s    | GGCATCATCGAATCATTCAAG    |
|                | rtGLK2a    | TCCTTGACGTTGTA ACTCC     |
| <i>LHCB2.1</i> | rtLHCB2.1s | CTCCGCAAGGTTGGTGTATC     |
|                | rtLHCB2.1a | CGGTTAGGTAGGACGGTGTAT    |

|              |          |                         |
|--------------|----------|-------------------------|
| <i>GUN4</i>  | rtGUN4s  | TGATGGTAGATTTCGGATACAGC |
|              | rtGUN4a  | CAAGAAGCTTCATCCACTCAAC  |
| <i>GUN5</i>  | rtGUN5s  | ATCTGAGACAGTGAGGCT      |
|              | rtGUN5a  | CCTCCTCGTAGACCCAAT      |
| <i>SRP54</i> | rtSRP54s | GATAATGAGGATAGCGAGAGGG  |
|              | rtSRP54a | CATCTGTTTTAGCATCTGAGGC  |
| <i>ACTIN</i> | ACTINs   | AACTGGGATGATATGGAGAA    |
|              | ACTINa   | CCTCCAATCCAGACACTGTA    |
